# Supplementary material
Source: PubMed Central journal article supplement (PMC3535572)
Supplement: NIHMS426982-supplement-01.pdf [file NIHMS426982-supplement-01.pdf]

DMTDTPCKAK STPEAPEDFP QTPLKGPAVE ALD34SEQE40IAT FVKD45TILKAA LITEENQQLS  
 YEHIAKANEL 71SSQLPLGAQE LQ83SILEQDKL TPESTREFLC INGSIHFOPL KEPSPNLQLQ  
 IVQSQKTFSK EGILMPEEPE TQAVL146/8SDTEK IFPSAMSIEQ INSLTVEPLK TLLAEPEGNY  
 PQSSIEPPMH SYLTSVAEEV LSPKEKTVSD TNREQRVTLQ KQEAQSALIL SQSLAEGHVE  
 SLQSPDVMIS QVNYEPLVPS EHSCTEGGKI LIESANPLEN AGQDSAVRIE EGKSLRFPLA  
 LEEKQVLLKE EHSDNVVMP DQIIIESKREP VAIKKVQEVQ GRDLLSKESL LSGIPEEQRL  
 NLKIQICRAL QAAVASEQPG LFSEWLRNIE KVEVEAVNIT QEPRHIMCMY LVTSAKSVTE  
 EVTIIIEDVD PQMANLKMEL RDALCAIIE EIDILTAEGP RIQQGAKTSL QEEMDSFSGS  
 QKVEPI487TEPE VE493SKYLISTE EVSYFNVQSR VKYLDATPVT KGVASAAVSD EKQDESLKPS  
 EEKEESSSES GSEEVATVKI QEAEGLIKE DG

Supplemental Fig. 1
